# Supplementary material
Source: publisher site journal article supplement (https://www.spandidos-publications.com/2053/downloadSupplementary)

Figure S1. Three-dimensional high performance liquid chromatography chromatogram of T-2 toxin. The colors represent the different absorbance units. Two main peaks were observed at 3 and 12 min, which represent the solvent peak and T-2 toxin, respectively.

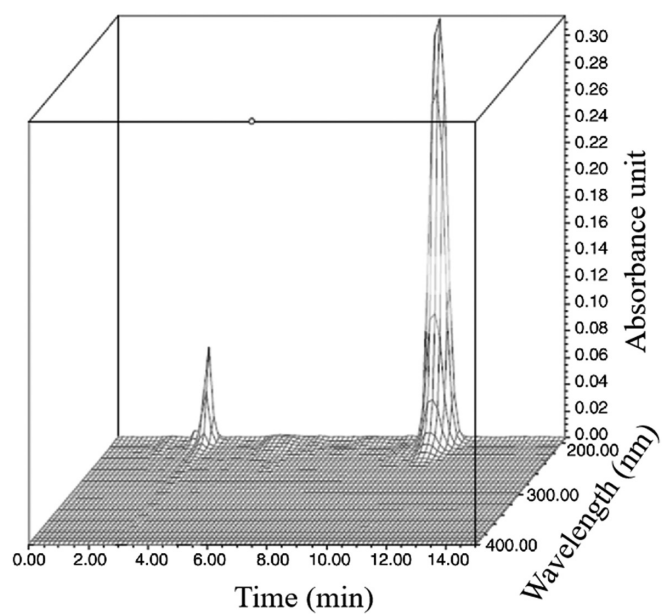

Supplement: Supplementary file 1 [file downloadSupplementary]
